# Supplementary material
Source: PubMed Central journal article supplement (PMC3306452)

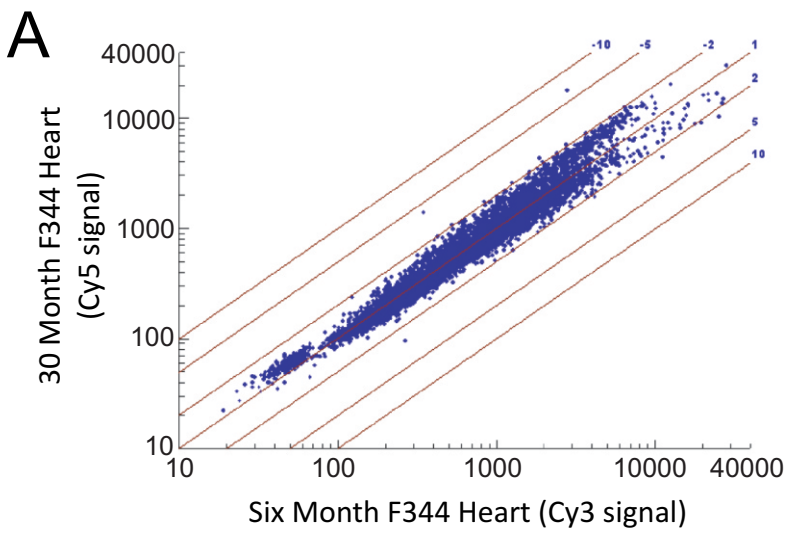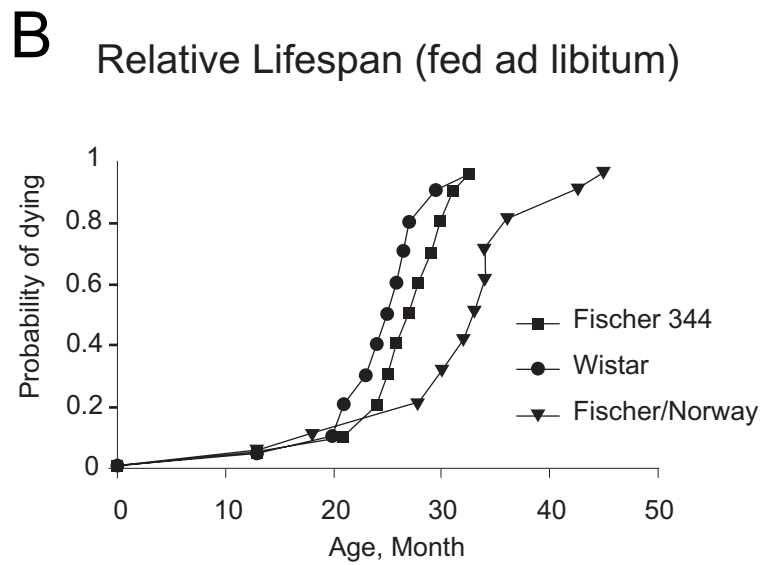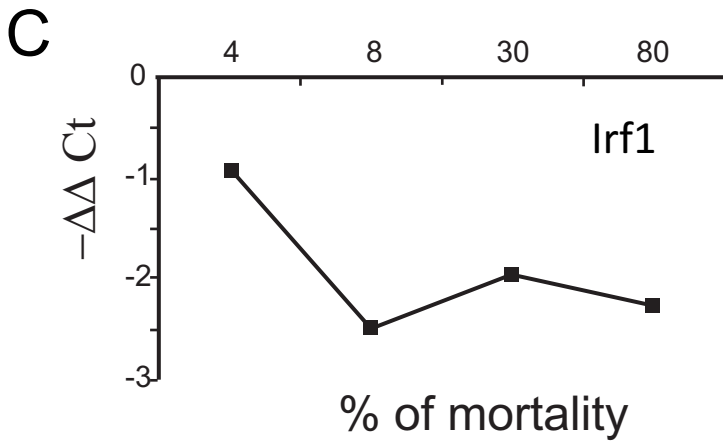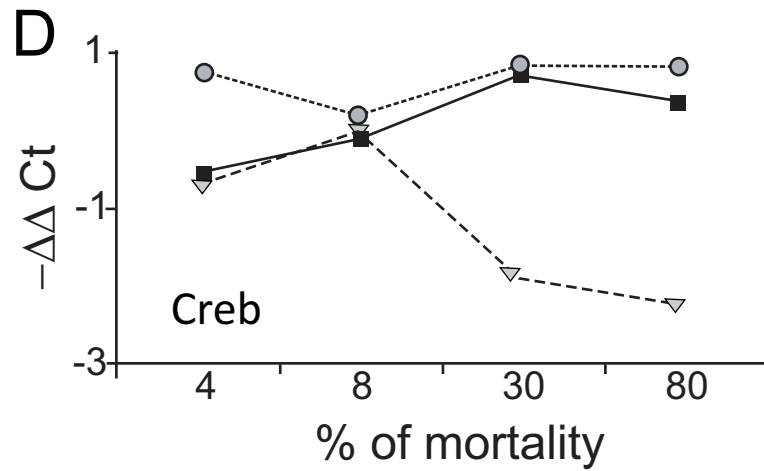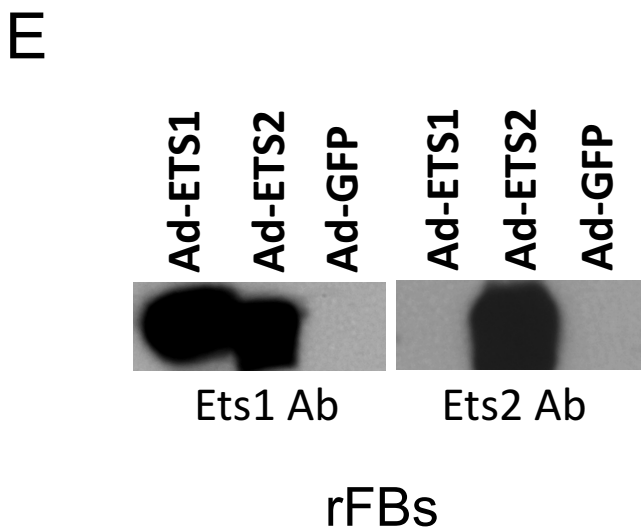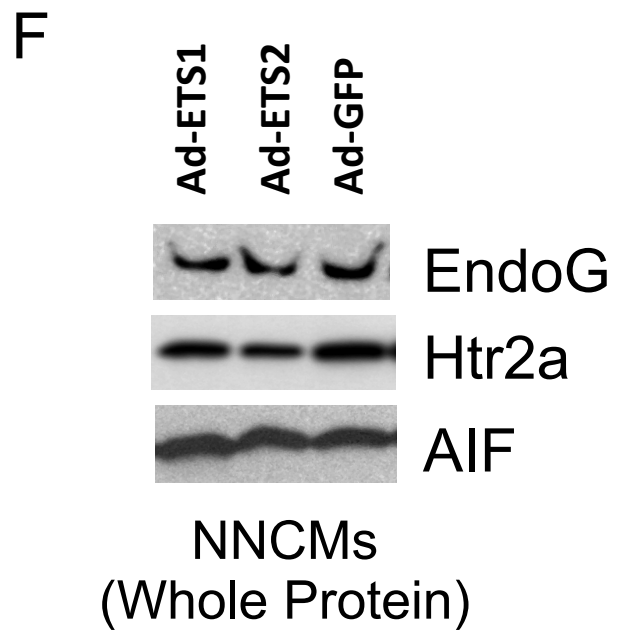

Supplement: NIHMS350143-supplement-Supp_Fig_S1.pdf [file NIHMS350143-supplement-Supp_Fig_S1.pdf]
